# Supplementary material for: Induction of Stable Drug Resistance in Human Breast Cancer Cells Using a Combinatorial Zinc Finger Transcription Factor Library
Source: PLoS One. 2011 Jul 19;6(7):e21112. doi: 10.1371/journal.pone.0021112 (PMC3139592; doi:10.1371/journal.pone.0021112)
Supplement: Table S1 — Chemotherapeutic agents and investigational compounds used in the drug sensitivity screen. (XLS) [file pone.0021112.s003.xls]

## Sheet: Table S1
Table S1. Chemotherapeutic agents and investigational compounds used in the drug sensitivity screen.
1.Tarceva
2.Rapamycin
3.JHU-1132
4.AZ B-Raf Inhibitor
5.Sutent
6.PHA665752
7.Sorafenib
8.MG-132
9.TP-155
10.Taxol
11.HKI-272
12.KIN001-006
13.KIN001-014
14.KIN001-017
15.KIN001-022
16.KIN001-023
17.KIN001-045
18.Cyclopamine
19.Go 6976
20.Geldanamycin
21.S-Trityl-L-cysteine
22.Z-L-L-Norleucine-CHO
23.SUTENT + HCQ
24.Sorafenib + HCQ
