# Supplementary material for: Induction of Stable Drug Resistance in Human Breast Cancer Cells Using a Combinatorial Zinc Finger Transcription Factor Library
Source: PLoS One. 2011 Jul 19;6(7):e21112. doi: 10.1371/journal.pone.0021112 (PMC3139592; doi:10.1371/journal.pone.0021112)
Supplement: Table S3 — Gene Sets enriched in ZF-TF 7, 19, and 70-induced fulvestrant resistant cells (Gene Cluster 1: 230 genes). (XLS) [file pone.0021112.s005.xls]

## Sheet: Sheet1
Table S3 . Gene Sets enriched in ZF-FT7,19,and 70-induced fulvestrant resistant cells (Gene Cluster 1: 230 genes)
number in set	number in intersection	number expected in intersection	odds ratio	p-val	FWER	FDR	source	name	intersection
527	28	5.7	5.7	3.68e-12	8.22e-09	6.91e-09	MSigDBv2.5 c2	BRCA ER POS	AGR2, ALCAM, ASAH1, C14orf132, CAMK2N1, CCNI, CSNK1A1, ECM1, GALNT7, HSPA1A, ITGB5, KIAA1324, LASS6, MAP3K1, MKNK2, MREG, MSX2, MUC1, MYO5C, NGRN, RNF103, SEC16A, SORD, STARD10, TMBIM6, TSPAN13, WNT5A, XBP1
326	22	3.5	7.2	8.8e-12	1.97e-08	6.91e-09	MSigDBv2.5 c2	LEI MYB REGULATED GENES	AGR2, ARF6, ASAH1, ASNS, ATP2A3, HSPA1A, HSPA1B, LCN2, LTA4H, MUC1, PDIA6, PDXK, PUF60, S100A10, S100P, SEMA3F, TFAP2C, TM4SF1, TMEM106C, TRIP6, XBP1, ZFP36L2
396	24	4.3	6.5	9.28e-12	2.07e-08	6.91e-09	MSigDBv2.5 c2	UVB NHEK3 ALL	ALCAM, ASNS, BAMBI, CYFIP1, EPHA4, FAM120A, HK1, HMGB1, HSPH1, IQGAP1, ISCU, ITGB4, ITGB5, LCN2, MALL, MPRIP, NEU1, PGD, PON2, TM4SF1, TMED10, TSC22D1, XBP1, YES1
78	12	0.8	17.6	4.23e-11	9.45e-08	2.36e-08	MSigDBv2.5 c4	MORF DAP	AP2S1, CANX, DAP, ENSA, ERP29, FAM120A, GGCT, GPX4, SYPL1, TECR, TMBIM6, YWHAB
79	11	0.9	15.6	8.44e-10	1.88e-06	3.77e-07	MSigDBv2.5 c2	TARTE PC	CANX, HYOU1, IL15RA, KDELR2, NEU1, P4HB, PDIA6, PDXK, SSR1, TM9SF2, TMED10
181	15	1.9	8.8	1.22e-09	2.72e-06	4.55e-07	MSigDBv2.5 c4	MORF RAD23B	AP2S1, ATOX1, CANX, DAP, ENSA, FAM120A, G3BP1, GGCT, HSBP1, SYPL1, TMBIM6, TMEM106C, TMEM97, UBA1, YWHAB
214	16	2.3	7.9	1.53e-09	3.41e-06	4.89e-07	MSigDBv2.5 c4	MORF RAC1	AHCYL1, AP2S1, ATOX1, CANX, DAP, ENSA, FAM120A, GGCT, GPX4, ISCU, SYPL1, TMBIM6, TMEM106C, UBA1, UBE2A, YWHAB
1104	36	11.9	3.5	2.69e-09	6e-06	7.52e-07	MSigDBv2.5 c2	LEE TCELLS2 UP	AIM1, ASAH1, ASNS, ATP9A, CALM1, CIB1, CLDN1, CTSL1, FAM13A, GALNT7, GARS, GUSB, H2AFY, HLA-A, HLA-B, HLA-C, HLA-E, HLA-F, HLA-G, HMGB1, MAGED1, MAP3K1, MKNK2, NFKBIZ, PRKAR2A, RNASET2, S100A6, SCARB2, SORD, TAGLN2, TNFRSF21, TRGC2, TSC22D1, UBE2A, VDAC1, YES1
194	15	2.1	8.2	3.18e-09	7.09e-06	7.91e-07	MSigDBv2.5 c4	MORF PSMC1	AKT1, AP2S1, ATOX1, CALM1, CANX, ENSA, GGCT, HSBP1, PUF60, SYPL1, TECR, TMBIM6, TMED10, UBA1, YWHAB
171	14	1.8	8.7	5.17e-09	1.15e-05	1.16e-06	MSigDBv2.5 c4	MORF PPP1CA	AP2S1, CANX, DAP, ENSA, ERP29, FAM120A, GGCT, HSBP1, PUF60, SYPL1, TECR, TMBIM6, UBA1, YWHAB
79	10	0.9	13.9	1.3e-08	2.89e-05	2.64e-06	MSigDBv2.5 c4	GNF2 STAT6	ARF6, B2M, HLA-A, HLA-B, HLA-C, HLA-E, HLA-F, HLA-G, IQGAP1, RNASET2
47	8	0.5	19.5	3.5e-08	7.79e-05	6.53e-06	MSigDBv2.5 c4	GNF2 HLA-C	ARF6, B2M, HLA-A, HLA-B, HLA-C, HLA-E, HLA-F, HLA-G
280	16	3	5.9	6.93e-08	0.000154	1.19e-05	MSigDBv2.5 c4	MORF SOD1	AP2S1, ATOX1, CANX, DAP, ENSA, FAM120A, G3BP1, GGCT, HSBP1, PUF60, SYPL1, TECR, TMBIM6, TMEM106C, VDAC1, YWHAB
98	10	1.1	10.9	1.05e-07	0.000234	1.68e-05	MSigDBv2.5 c4	MORF RAB5A	ATOX1, ATP6AP2, ENSA, HSBP1, ISCU, SYPL1, TMBIM6, TMED10, UBA1, YWHAB
154	12	1.7	8.1	1.14e-07	0.000252	1.69e-05	MSigDBv2.5 c2	BRCA BRCA1 NEG	CAMK2N1, CSNK1A1, EPHA4, GALNT7, ITGB5, LIMCH1, MAP3K1, SH3BP4, SORD, STARD10, TMBIM6, UBE2Q2
220	14	2.4	6.6	1.25e-07	0.000278	1.75e-05	MSigDBv2.5 c4	MORF AP2M1	AP2S1, ATOX1, CALM1, CANX, ENSA, GNAS, GPX4, HSBP1, P4HB, PGD, PUF60, TMBIM6, UBA1, YWHAB
160	12	1.7	7.8	1.73e-07	0.000384	2.27e-05	MSigDBv2.5 c2	BRCA1 OVEREXP UP	ALCAM, ARF6, CSNK1A1, IQGAP1, KDELR2, KRT4, NEU1, PPIC, SSR1, TM9SF2, TMBIM6, TMED10
196	13	2.1	6.9	2.21e-07	0.00049	2.61e-05	MSigDBv2.5 c4	MORF RAB1A	ATOX1, ATP6AP2, CANX, CIB1, ENSA, P4HB, PUF60, RNF103, SSR1, TMBIM6, UBA1, UBE2A, YWHAB
81	9	0.9	11.9	2.22e-07	0.000491	2.61e-05	MSigDBv2.5 c4	MORF ATOX1	AP2S1, ATOX1, CANX, ENSA, GGCT, HSBP1, TMBIM6, UBA1, YWHAB
933	29	10	3.2	3.03e-07	0.000672	3.39e-05	MSigDBv2.5 c2	BRCA ER NEG	AIM1, ASNS, BACE2, CLDN1, DKK1, EPHA4, FABP7, GARS, HLA-F, HYOU1, IFNGR1, IL15RA, ITGB4, KLF5, LSR, MALL, PDIA6, PDXK, PTPLB, S100A10, S100A6, SLPI, SSR1, TM4SF1, TMEM123, TNFAIP2, TNFRSF21, TRIP6, YES1
43	7	0.5	18.4	3.55e-07	0.000786	3.78e-05	MSigDBv2.5 c4	GNF2 INPP5D	ARF6, HLA-A, HLA-B, HLA-C, HLA-E, HLA-F, HLA-G
145	11	1.6	7.9	5.07e-07	0.00112	5.15e-05	MSigDBv2.5 c4	MORF PRKAR1A	AHCYL1, ATOX1, CANX, ENSA, FAM120A, HSBP1, PUF60, TMBIM6, UBA1, UBE2A, YWHAB
118	10	1.3	8.8	6.09e-07	0.00135	5.72e-05	MSigDBv2.5 c4	MORF PSMC2	ATP6AP2, CANX, ENSA, FAM120A, G3BP1, HSBP1, PUF60, SYPL1, UBA1, YWHAB
289	15	3.1	5.3	6.15e-07	0.00136	5.72e-05	MSigDBv2.5 c4	MORF CSNK2B	AP2S1, CANX, DAP, ERP29, FAM120A, GGCT, GPX4, PUF60, SLC1A5, SYPL1, TECR, TMBIM6, UBA1, VDAC1, YWHAB
47	7	0.5	16.6	6.68e-07	0.00148	5.97e-05	MSigDBv2.5 c4	GNF2 PTPN6	B2M, HLA-A, HLA-B, HLA-C, HLA-E, HLA-F, HLA-G
17	5	0.2	39.1	7.72e-07	0.00171	6.63e-05	MSigDBv2.5 c2	GALE FLT3ANDAPL DN	HLA-A, HLA-B, HLA-C, HLA-G, P4HB
574	21	6.2	3.7	1.17e-06	0.00259	9.69e-05	MSigDBv2.5 c2	FLECHNER KIDNEY TRANSPLANT WELL UP	AHCYL1, ARF6, BAMBI, F2RL1, G3BP1, HLA-A, HLA-B, HLA-C, HLA-F, HLA-G, HSBP1, HSPA1A, HSPA1B, IFNGR1, NCOA3, NEK7, PDIA3, SYPL1, TMED10, TMEM123, TSC22D1
56	7	0.6	13.5	2.27e-06	0.00501	0.000181	MSigDBv2.5 c4	MORF GPX4	AP2S1, CANX, DAP, GPX4, TECR, TMBIM6, UBA1
58	7	0.6	13	2.89e-06	0.00637	0.000208	MSigDBv2.5 c2	LEE TCELLS4 UP	HLA-A, HLA-B, HLA-C, HLA-E, HLA-F, MAP3K1, RNASET2
58	7	0.6	13	2.89e-06	0.00637	0.000208	MSigDBv2.5 c4	MORF BAG5	CANX, ENSA, FAM120A, PUF60, SYPL1, UBA1, YWHAB
58	7	0.6	13	2.89e-06	0.00637	0.000208	MSigDBv2.5 c4	GNF2 CD53	B2M, HLA-A, HLA-B, HLA-C, HLA-E, HLA-F, HLA-G
662	22	7.1	3.4	3.11e-06	0.00685	0.000217	MSigDBv2.5 c2	RUTELLA HEMATOGFSNDCS DIFF	ASAH1, ASMTL, CCNI, CTSL1, ENSA, F2RL1, HLA-E, HOMER2, LASS6, LTA4H, MPRIP, MREG, NCOA3, NET1, PDXK, RNASET2, RUNX1, SCARB2, ST3GAL1, TMBIM6, TMEM97, TSC22D1
151	10	1.6	6.8	5.74e-06	0.0127	0.000389	MSigDBv2.5 c2	BROWN GRAN MONO DIFFERENTIATION	ALCAM, CLDN1, GYG1, HOMER2, IQGAP1, LCN2, PGD, S100A6, SCARB2, SLC6A6
128	9	1.4	7.2	1.05e-05	0.023	0.000687	MSigDBv2.5 c2	ELECTRON TRANSPORTER ACTIVITY	ALDH3A1, ASPH, GPX4, MB, P4HB, PDIA3, PDIA4, PDIA6, PGD
207	11	2.2	5.4	1.6e-05	0.0352	0.00102	MSigDBv2.5 c4	MORF SKP1A	AP2S1, CANX, DAP, ENSA, GGCT, HSBP1, PUF60, SYPL1, TMBIM6, UBA1, YWHAB
51	6	0.5	12.6	1.75e-05	0.0386	0.00109	MSigDBv2.5 c4	MORF PPP2R4	ATOX1, HSBP1, TMBIM6, TMED10, UBA1, YWHAB
1473	34	15.9	2.4	2.08e-05	0.0458	0.00126	MSigDBv2.5 c2	ALZHEIMERS DISEASE UP	AIM1, BGN, CCNI, CHD2, CIB1, CSNK1A1, DYNLT1, GUSB, HLA-E, HSBP1, IGFBP5, IQGAP1, ITGB4, ITGB5, KLF5, MB, MKNK2, MUC1, MYO5C, NCOA3, NCOR2, NEK7, NUCKS1, PDIA4, PTRF, RNASET2, SEMA3F, SORD, TGIF1, TMBIM6, TRIM14, XBP1, YES1, ZFP36L2
16	4	0.2	31.1	2.15e-05	0.0473	0.00126	MSigDBv2.5 c2	5FU RESIST GASTRIC DN	BACE2, ITGB4, S100A14, S100P
32	5	0.3	17.4	2.2e-05	0.0484	0.00126	MSigDBv2.5 c4	GNF2 CD48	HLA-A, HLA-B, HLA-C, HLA-E, HLA-F
