# Supplementary material for: Induction of Stable Drug Resistance in Human Breast Cancer Cells Using a Combinatorial Zinc Finger Transcription Factor Library
Source: PLoS One. 2011 Jul 19;6(7):e21112. doi: 10.1371/journal.pone.0021112 (PMC3139592; doi:10.1371/journal.pone.0021112)
Supplement: Table S4 — Gene Sets enriched in ZF-TF 64-induced fulvestrant resistant cells (Gene Cluster 2: 225 genes). (XLS) [file pone.0021112.s006.xls]

## Sheet: Sheet1
Table S4. Gene Sets enriched in ZF-TF64-induced fulvestrant resistant cells (Gene Cluster 2 consisting of 225 genes)
number in set	number in intersection	number expected in intersection	odds ratio	p-val	FWER	FDR	source	name	intersection
372	25	3.9	7.5	2.05e-13	4.59e-10	4.59e-10	MSigDBv2.5 c2	DIAB NEPH DN	ACSL3, ARF6, CITED2, CTBP1, CTGF, CTNNA1, DNAJB9, DUSP1, FAT1, GADD45A, GPNMB, GPRC5A, HNRNPA1, HSPA5, MEGF9, MTSS1, NDRG1, NFE2L1, PAWR, PCMT1, PLOD2, PRKAR2B, RNF11, TOB1, TRIM37
326	20	3.4	6.6	2.97e-10	6.62e-07	3.31e-07	MSigDBv2.5 c2	LEI MYB REGULATED GENES	ANXA2, ARF6, BRD2, CAV1, CCND1, CDKN1A, DDR1, HNRNPA1, HSPA1A, HSPA1B, KTN1, MAP1LC3B, MCL1, MT1X, PLK2, SELENBP1, SFN, TFAP2A, TPM1, TRIM37
178	15	1.9	9.2	7.14e-10	1.59e-06	5.32e-07	MSigDBv2.5 c2	UVB NHEK1 UP	ANXA2, BRD2, CITED2, CTGF, DUSP1, GADD45A, HSP90AB1, MAP1LC3B, PGK1, QPCT, RAP1A, SFN, SURF1, TOB1, UBE2S
574	24	6	4.5	1.04e-08	2.32e-05	5.82e-06	MSigDBv2.5 c2	FLECHNER KIDNEY TRANSPLANT WELL UP	ACSL3, ARF6, ATP6V1A, C14orf147, CD44, CDK13, CITED2, CTNNA1, FAT1, GTF2I, HERPUD1, HSPA1A, HSPA1B, HSPA5, MARCKS, MCL1, MEGF9, PGK1, PLOD2, SCAMP1, SELENBP1, SERINC3, TFPI, TOB1
1473	40	15.5	3	2.86e-08	6.37e-05	1.28e-05	MSigDBv2.5 c2	ALZHEIMERS DISEASE UP	AMOTL2, ANXA2, APP, BRD2, CD44, CDK13, COL18A1, CTBP1, CTNNA1, CXCR7, DDX6, DHFR, EFEMP1, EIF4B, FOXO3, HIST1H1C, HIST1H4H, HNRNPA1, IL13RA1, KTN1, MAP2K2, MARCH6, MT1H, MT1X, MXI1, NFE2L1, OPHN1, PAWR, PDE4C, PLOD2, PPM1D, RPS6KA5, SEC62, SEPP1, SFN, SLC38A1, SPOP, STAG2, TFAP2A, TRPS1
662	25	7	4	3.74e-08	8.33e-05	1.33e-05	MSigDBv2.5 c2	RUTELLA HEMATOGFSNDCS DIFF	ACSL3, ANXA2, BHLHE41, C6orf48, CCND1, CD81, CDKN1A, CYB5A, FTH1, GPNMB, HERPUD1, HK2, IER5, IL13RA1, MARCKS, MCL1, MT1F, MT1G, MT1H, MT1X, MT2A, NDRG1, SCD, SQSTM1, TFRC
396	19	4.2	5.1	4.57e-08	0.000102	1.33e-05	MSigDBv2.5 c2	UVB NHEK3 ALL	APP, ATP6V0C, BRD2, CDKN1A, CITED2, CTGF, CTNNA1, CYB5A, DUSP1, FAT1, GADD45A, GDF15, HNRNPA1, MT1X, PCMT1, PPP3CA, TAF7, TFAP2A, TFRC
147	12	1.5	8.8	5.35e-08	0.000119	1.33e-05	MSigDBv2.5 c2	BROCKE IL6	ATP2B4, CD44, DNAJB9, FOXO3, GADD45A, GNA13, HSPA1A, HSPA1B, MARCKS, MCL1, MT1H, MT1X
147	12	1.5	8.8	5.35e-08	0.000119	1.33e-05	MSigDBv2.5 c2	KRETZSCHMAR IL6 DIFF	ATP2B4, CD44, DNAJB9, FOXO3, GADD45A, GNA13, HSPA1A, HSPA1B, MARCKS, MCL1, MT1H, MT1X
1125	33	11.9	3.2	9.58e-08	0.000213	1.95e-05	MSigDBv2.5 c2	ALZHEIMERS DISEASE DN	ACSL3, ADIPOR1, AHSA1, APP, ARPP19, ATP6AP1, ATP6V0C, ATP6V1A, DDT, DIO2, DNAJB9, HSP90AB1, HSPA5, LMO4, MCCC2, MGEA5, MLF2, PCMT1, PGK1, PLK2, PPP3CA, PRKAR2B, QPCT, RANBP9, REEP5, RNF11, RTN3, SCAMP1, SERINC3, STMN3, TFRC, TRIM37, UBE2B
550	22	5.8	4.2	9.62e-08	0.000214	1.95e-05	MSigDBv2.5 c2	FLECHNER KIDNEY TRANSPLANT REJECTION DN	ATP6V1A, C14orf147, CA2, CTBP1, CTNNA1, CYB5A, DDT, DNAJB9, FAT1, GTF2I, MARCH6, MT1G, MT1X, MTSS1, MXI1, NDRG1, PDE8A, PEBP1, PGK1, SCAMP1, SELENBP1, TOB1
259	15	2.7	6.1	1.13e-07	0.000252	2.05e-05	MSigDBv2.5 c2	RAS ONCOGENIC SIGNATURE	ATP2B1, DLL1, DUSP1, GDF15, GLCCI1, HK2, HOXC6, KCNN4, MAP1LC3B, MCL1, NDRG1, SFN, TOB1, TOP1, TPM1
190	13	2	7.3	1.19e-07	0.000266	2.05e-05	MSigDBv2.5 c2	PENG LEUCINE DN	AHSA1, ALDOA, BRD2, HSP90AB1, HSPA5, MLF2, NOMO1, NOMO2, PGK1, SCD, TFRC, TOP1, UBE2S
7	4	0.1	127.5	4.09e-07	0.000909	6.53e-05	MSigDBv2.5 c2	ZELLER MYC DN	CDKN1A, DUSP1, GADD45A, TPM1
47	7	0.5	16.9	5.76e-07	0.00128	8.59e-05	MSigDBv2.5 c2	NAKAJIMA MCSMBP MAST	GDF15, GPNMB, HSP90AB1, MT1F, MT1H, MT2A, PEBP1
72	8	0.8	12.1	8.97e-07	0.00199	0.000119	MSigDBv2.5 c2	ADDYA K562 HEMIN TREATMENT	FTH1, HERPUD1, HSPA1B, HSPA5, IER5, MCL1, MT2A, UCP2
157	11	1.7	7.4	9.03e-07	0.002	0.000119	MSigDBv2.5 c2	RUTELLA HEPATGFSNDCS UP	BHLHE41, CCND1, GPNMB, HK2, MT1F, MT1G, MT1H, MT1X, MT2A, NDRG1, SQSTM1
19	5	0.2	34.3	1.28e-06	0.00284	0.000159	MSigDBv2.5 c2	UVC LOW ALL UP	CDKN1A, GDF15, GPRC5A, PLK2, TOB1
200	12	2.1	6.3	1.49e-06	0.00331	0.000176	MSigDBv2.5 c2	GAY YY1 UP	CDKN1A, CXCR7, DUSP1, EFEMP1, GLCCI1, HIST1H1C, PAWR, PLOD2, SEPP1, SFN, SURF1, TPM1
104	9	1.1	9.2	1.57e-06	0.00348	0.000176	MSigDBv2.5 c2	MENSE HYPOXIA UP	BHLHE41, GADD45A, HK2, MXI1, NDRG1, PGK1, PLOD2, PPP3CA, SCD
36	6	0.4	19.3	1.91e-06	0.00423	0.000203	MSigDBv2.5 c2	HIF1 TARGETS	ALDOA, CDKN1A, CITED2, HK2, PGK1, TFRC
21	5	0.2	30	2.2e-06	0.00487	0.000223	MSigDBv2.5 c2	BLEO HUMAN LYMPH HIGH 4HRS UP	CDKN1A, GADD45A, GDF15, HNRNPA1, PPM1D
10	4	0.1	63.7	2.4e-06	0.0053	0.000233	MSigDBv2.5 c2	UVC LOW A2 UP	CDKN1A, GDF15, GPRC5A, PLK2
22	5	0.2	28.2	2.82e-06	0.00624	0.000252	MSigDBv2.5 c2	VERNELL PRB CLSTR2	CCND1, CITED2, CTGF, GPRC5A, HIST2H2BE
22	5	0.2	28.2	2.82e-06	0.00624	0.000252	MSigDBv2.5 c2	UVB NHEK1 C2	CITED2, CTGF, GADD45A, TOB1, UBE2S
150	10	1.6	7	4.46e-06	0.00985	0.000383	MSigDBv2.5 c2	IRITANI ADPROX VASC	CD44, CDKN1A, EFEMP1, GADD45A, MT1F, MT1H, MT1X, MT2A, PLOD2, TPM1
25	5	0.3	24	5.55e-06	0.0123	0.000459	MSigDBv2.5 c2	BRCA1 SW480 UP	CDKN1A, CTNNA1, GADD45A, TOP1, UBE2B
69	7	0.7	10.9	8.12e-06	0.0179	0.000648	MSigDBv2.5 c2	HDACI COLON BUT24HRS UP	CD81, HIST1H1C, MAP1LC3B, MT1G, MT1H, NEAT1, PSAP
238	12	2.5	5.2	8.96e-06	0.0198	0.000691	MSigDBv2.5 c2	ROME INSULIN 2F UP	AHSA1, ALDOA, ARPP19, HERPUD1, HK2, IL13RA1, NFE2L1, PAIP2, SPOP, TAF7, TPM1, UBE2B
426	16	4.5	3.9	1.26e-05	0.0279	0.000942	MSigDBv2.5 c2	PGC	CA2, CXCR7, DDT, DNAJB9, DUSP1, EIF4A2, GDF15, GNA13, HSPA5, MT2A, PGK1, RUVBL2, SCD, SUCLG1, TFRC, UBE2B
103	8	1.1	8.2	1.35e-05	0.0297	0.000972	MSigDBv2.5 c2	CMV ALL DN	CCND1, CNN2, CXCR7, EFEMP1, MARCKS, NR3C1, TFAP2A, TPM1
52	6	0.5	12.6	1.74e-05	0.0383	0.00121	MSigDBv2.5 c2	HOFMANN MDS CD34 LOW RISK	ANXA2, CCND1, CDKN1A, GDF15, GPRC5A, SFN
16	4	0.2	31.9	1.98e-05	0.0435	0.00132	MSigDBv2.5 c2	CIS RESIST GASTRIC UP	CDKN1A, HSPA1B, IER5, TFPI
178	10	1.9	5.8	2.01e-05	0.0442	0.00132	MSigDBv2.5 c2	LI FETAL VS WT KIDNEY UP	AMOTL2, CYB5A, GADD45A, HERPUD1, NR3C1, PDE8A, REEP5, SEPP1, TFPI, TOB1
80	7	0.8	9.3	2.17e-05	0.0477	0.00135	MSigDBv2.5 c2	GALINDO ACT UP	CD44, DUSP1, GADD45A, HERPUD1, MT2A, SCD, SQSTM1
397	15	4.2	3.9	2.21e-05	0.0487	0.00135	MSigDBv2.5 c2	PROLIFERATION GENES	BHLHE41, BUB3, CD81, CDK13, CDKN1A, COL18A1, CTBP1, CXCR7, FTH1, GPNMB, MXI1, PAWR, PPM1D, SFN, TOB1
6	3	0.1	95.2	2.25e-05	0.0496	0.00135	MSigDBv2.5 c2	COLLER MYC DN	CDKN1A, CTGF, TPM1
