# Supplementary material for: Induction of Stable Drug Resistance in Human Breast Cancer Cells Using a Combinatorial Zinc Finger Transcription Factor Library
Source: PLoS One. 2011 Jul 19;6(7):e21112. doi: 10.1371/journal.pone.0021112 (PMC3139592; doi:10.1371/journal.pone.0021112)
Supplement: Table S6 — Gene Sets enriched in ZF-TF 115-induced fulvestrant resistant cells (Gene Cluster 4: 123 genes). (XLS) [file pone.0021112.s008.xls]

## Sheet: Sheet1
Table S6. Gene Sets enriched in ZF-FT115-induced fulvestrant resistant cells (Gene Cluster 4 consisting of 123 genes)
number in set	number in intersection	number expected in intersection	odds ratio	p-val	FWER	FDR	source	name	intersection
26	7	0.1	67.4	1.06e-10	2.37e-07	2.37e-07	MSigDBv2.5 c1	chrxq27	LDOC1, SPANXA1, SPANXA2, SPANXB1, SPANXB2, SPANXC, SPANXF1
550	18	3.2	6.7	2.7e-09	6.02e-06	3.01e-06	MSigDBv2.5 c2	FLECHNER KIDNEY TRANSPLANT REJECTION DN	AKR1C1, AKR1C2, AKR1C3, ATP6V0E1, CD36, CDH1, CLTB, DDC, DLD, DSP, EIF3I, FAM127A, FBP1, GULP1, HADHB, IDH1, RTN4, UQCRC2
326	13	1.9	7.9	5.23e-08	0.000117	3.38e-05	MSigDBv2.5 c2	LEI MYB REGULATED GENES	AKR1C1, AKR1C2, ANXA1, CD59, CDH1, CEBPB, FBP1, LASP1, MYL12A, S100A8, S100A9, UBC, ZNF217
220	11	1.3	9.9	6.05e-08	0.000135	3.38e-05	MSigDBv2.5 c4	MORF AP2M1	AP2M1, ARPC2, FKBP1A, HADHB, HSP90AA1, LASP1, MYL12A, MYL12B, SUMO3, UBC, YWHAB
1125	23	6.5	4.2	1.02e-07	0.000226	4.54e-05	MSigDBv2.5 c2	ALZHEIMERS DISEASE DN	ACTN1, AP2M1, ARPC2, CAP1, CD59, DLD, FAM127A, FERMT2, GCH1, HSP90AA1, LDOC1, MGLL, MYL12A, MYL12B, NDUFA10, NELL2, NQO1, RTN4, SAT1, UBC, UGP2, UQCRC2, YWHAB
574	16	3.3	5.5	2e-07	0.000445	6.35e-05	MSigDBv2.5 c2	FLECHNER KIDNEY TRANSPLANT WELL UP	ACTN1, AKR1C1, AKR1C2, AKR1C3, ATP6V0E1, CD36, DLD, EIF3I, FAM127A, GCH1, GULP1, IDH1, LASP1, PDCD6, SDCBP, SEC22B
196	10	1.1	10	2.05e-07	0.000458	6.35e-05	MSigDBv2.5 c4	MORF RAB1A	AP2M1, HADHB, HTATSF1, LASP1, MYL12A, MYL12B, RTN4, SEC22B, SUMO3, YWHAB
24	5	0.1	47.3	2.27e-07	0.000506	6.35e-05	MSigDBv2.5 c4	GNF2 MSN	ACTR3, ARPC2, CAP1, LASP1, RAP2B
47	6	0.3	26.5	2.85e-07	0.000636	7.09e-05	MSigDBv2.5 c2	DAVIES MGUS MM	ACTN1, CAP1, CD36, LASP1, S100A8, SAT1
27	5	0.2	40.9	4.26e-07	0.000947	9.51e-05	MSigDBv2.5 c2	NAB LUNG UP	ESYT2, HADHB, PRDX1, SAT1, TIMP1
171	9	1	10.3	6.59e-07	0.00147	0.000121	MSigDBv2.5 c4	MORF PPP1CA	AP2M1, ARPC1B, HNRNPA3, HSP90AA1, MYL12A, MYL12B, PDCD6, SUMO3, YWHAB
280	11	1.6	7.7	6.79e-07	0.00151	0.000121	MSigDBv2.5 c4	MORF SOD1	AP2M1, DLD, EIF3I, HADHB, HNRNPA3, HSP90AA1, MYL12B, PDCD6, RTN4, UQCRC2, YWHAB
87	7	0.5	16	7.05e-07	0.00157	0.000121	MSigDBv2.5 c4	MORF MBD4	AP2M1, HADHB, MYL12A, MYL12B, PDCD6, UGP2, YWHAB
129	8	0.7	12.1	8.19e-07	0.00182	0.000131	MSigDBv2.5 c4	MORF AP3D1	ACTR3, AP2M1, CAP1, FKBP1A, HADHB, RTN4, WDR1, YWHAB
184	9	1.1	9.5	1.22e-06	0.0027	0.000181	MSigDBv2.5 c4	MORF RAD21	DLD, HNRNPA3, HSP90AA1, HTATSF1, MYL12B, PDCD6, SUMO3, UQCRC2, YWHAB
194	9	1.1	9	1.88e-06	0.00418	0.000261	MSigDBv2.5 c4	MORF PSMC1	AP2M1, ATP6V0E1, HNRNPA3, HSP90AA1, MYL12A, MYL12B, PDCD6, SUMO3, YWHAB
145	8	0.8	10.7	1.98e-06	0.0044	0.000261	MSigDBv2.5 c4	MORF PRKAR1A	AP2M1, ATP6V0E1, HADHB, MYL12A, MYL12B, PDCD6, UGP2, YWHAB
69	6	0.4	17.2	2.87e-06	0.00638	0.000357	MSigDBv2.5 c2	HDACI COLON BUT24HRS UP	CAP1, CDH1, HSP90AA1, PRDX1, SAT1, TIMP1
271	10	1.6	7.1	3.9e-06	0.00865	0.000459	MSigDBv2.5 c4	MORF RAN	AP2M1, HADHB, HNRNPA3, HSP90AA1, MYL12B, PDCD6, PRDX1, SUMO3, UQCRC2, YWHAB
118	7	0.7	11.5	5.49e-06	0.0122	0.000614	MSigDBv2.5 c2	HDACI COLON TSA UP	CD36, CDH1, FZD8, LASP1, MBNL2, SAT1, VGLL1
168	8	1	9.2	5.92e-06	0.0131	0.000631	MSigDBv2.5 c4	MORF CTBP1	AP2M1, ARPC2, CAP1, HADHB, HSP90AA1, SUMO3, WDR1, YWHAB
662	15	3.8	4.4	6.33e-06	0.014	0.000643	MSigDBv2.5 c2	RUTELLA HEMATOGFSNDCS DIFF	AKR1C1, AKR1C2, ATP6V0E1, CD59, CSRP1, FBP1, LAMP1, MARCKSL1, MGLL, MYD88, NQO1, PRDX1, S100A9, SEC22B, TEX2
