# Supplementary material for: Induction of Stable Drug Resistance in Human Breast Cancer Cells Using a Combinatorial Zinc Finger Transcription Factor Library
Source: PLoS One. 2011 Jul 19;6(7):e21112. doi: 10.1371/journal.pone.0021112 (PMC3139592; doi:10.1371/journal.pone.0021112)
Supplement: Table S7 — Gene Sets enriched in all ZF-TF-induced fulvestrant resistant cells (Gene Cluster 5: 72 genes). (XLS) [file pone.0021112.s009.xls]

## Sheet: Sheet1
Table S7. Gene Sets enriched in all ZF-FT-induced fulvestrant resistant cells (Gene Cluster 5 consisting of 72 genes )
number in set	number in intersection	number expected in intersection	odds ratio	p-val	FWER	FDR	source	name	intersection
527	25	1.8	22	1.89e-22	4.23e-19	4.23e-19	MSigDBv2.5 c2	BRCA ER POS	ANKRD50, ARL3, CA12, CELSR2, ELOVL2, ELP2, EVL, GFRA1, GLA, GLUL, GREB1, HSPB8, IGFBP4, IRS1, ITPK1, MYB, NPY1R, NRIP1, RAB31, SIAH2, SLC39A6, SLC9A3R1, SULF2, TFF1, TPBG
188	17	0.6	38.2	4.87e-20	1.09e-16	5.44e-17	Wirapati BCR 2008	WIRAPATI_ESR1_UP	ARL3, C6orf211, CA12, CELSR2, ELOVL2, EVL, GFRA1, GREB1, IGF1R, IRS1, MYB, SIAH2, SLC39A6, SLC9A3R1, TFF1, THSD4, TPBG
32	9	0.1	132.1	8.82e-16	1.97e-12	6.57e-13	MSigDBv2.5 c2	FRASOR ER UP	CA12, GREB1, IGFBP4, NRIP1, PRSS23, RAB31, SIAH2, SLC39A6, TFF1
396	15	1.3	14.4	3.57e-12	7.96e-09	1.99e-09	MSigDBv2.5 c2	UVB NHEK3 ALL	CD99, CELSR2, GLUL, ITGB1, ITPK1, KPNA2, ME1, NRIP1, PTP4A1, RAD23B, RBBP8, SEMA3C, SLC39A6, SLC7A5, TPBG
122	8	0.4	23.2	7.92e-09	1.77e-05	3.54e-06	MSigDBv2.5 c2	GH AUTOCRINE DN	C6orf211, ELOVL2, IGFBP4, OLFM1, RAB31, SEMA3C, SULF2, THBS1
48	6	0.2	46	1.3e-08	2.9e-05	4.85e-06	MSigDBv2.5 c2	STOSSI ER UP	CA12, GREB1, NRIP1, RHOBTB3, SLC9A3R1, TFF1
1104	16	3.7	5.3	6.2e-07	0.00138	0.000198	MSigDBv2.5 c2	LEE TCELLS2 UP	AMIGO2, ANKRD50, ARL3, CD99, ELOVL6, GLA, GLUL, IFI44, IRS1, KPNA2, MYB, NRAS, RBBP8, RHOBTB3, SOX4, TUBA1A
239	8	0.8	11.4	1.41e-06	0.00315	0.000394	MSigDBv2.5 c2	BAF57 BT549 UP	CA12, IGFBP4, IRS1, ME1, MGP, NRIP1, SULF2, TPBG
663	11	2.2	5.7	1.28e-05	0.0286	0.00318	MSigDBv2.5 c2	BOQUEST CD31PLUS VS CD31MINUS UP	ELOVL2, FABP5, IFI44, ME1, MGP, NPY1R, NRIP1, SLC7A5, SOX4, THBS1, TPD52L1
16	3	0.1	71.2	1.99e-05	0.0444	0.00443	MSigDBv2.5 c2	MTA3PATHWAY	CTSD, GREB1, TUBA1A
